# Supplementary material
Source: Springer Nature journal article supplement (https://www.springermedizin.de/resource/supplementary/12881_2013_1159_MOESM5_ESM.pdf/9452104)

**A rs721917**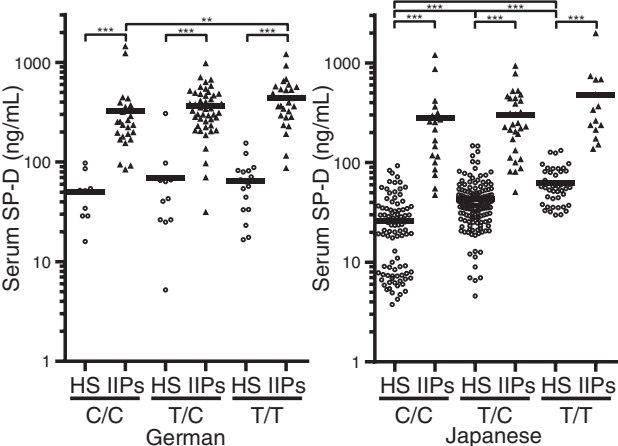**B rs1998374**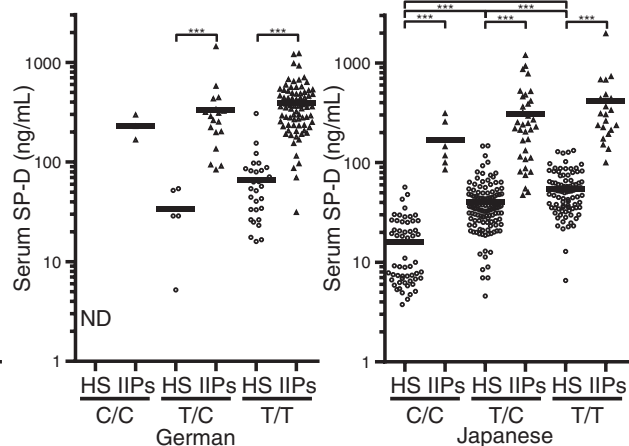**C rs2243639**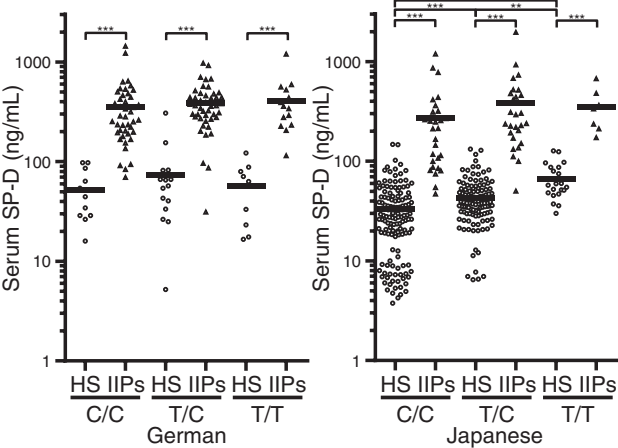**D rs3088308**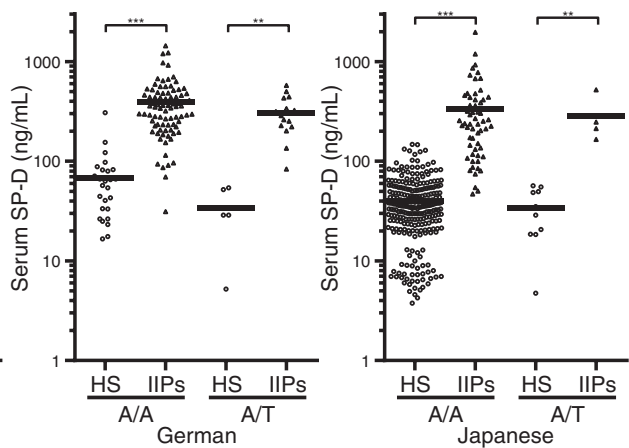

Supplement: MOESM5 [file 9452104]
